# Supplementary material for: Clinical characteristics, anti-SARS-CoV-2 IgG titers, and inflammatory markers in individuals with post-COVID-19 condition in Kenya: a cross-sectional study
Source: PeerJ. 2024 Jul 22;12:e17723. doi: 10.7717/peerj.17723 (PMC11271650; doi:10.7717/peerj.17723)
Supplement: Supplemental Information 1 — Data set has participants ids, IL-6, CRP, IgG, clinical symptoms and categorization of those with and without long Covid condition. [file peerj-12-17723-s001.xlsx]

## Sheet: IL-6
Participant	IL-6 Absorbance	Blank Absorbance	Blank corrected	Sample conc.	Blank Conc.	Concent. Minus blank	2× dilution factor	Final Conc. (2× dilution factor)	Interpretation						Samples 1-88	Samples 89-168	Samples 169-189
Sample 1	0.172	0.205	-0.033	67.59	81.08	-13.49	2	-26.98	< 4.688 pg/ml					x3	57703.7	6.97469e-09	-2.60508e-09
Sample 2	0.161		-0.044	63.06		-18.02		-36.04	< 4.688 pg/ml					x2	6.13983e-07	-3.42676e-06	-2.33468e-06
Sample 3	0.157		-0.048	61.4		-19.68		-39.36	< 4.688 pg/ml					x	0.00232764	0.00151399	0.00282709	Standard values for Samples 1–88
Sample 4	0.151		-0.054	58.92		-22.16		-44.32	< 4.688 pg/ml					c	0.0113735	0.0100527	0.0136909	Standard (pg/ml)	Absorbance	Blank Corrected
Sample 5	0.081		-0.124	29.66		-51.42		-102.84	< 4.688 pg/ml									0	0.205	0
Sample 6	0.192		-0.013	75.78		-5.3		-10.6	< 4.688 pg/ml									4.688	0.252	0.047
Sample 7	0.173		-0.032	68		-13.08		-26.16	< 4.688 pg/ml									9.375	0.212	0.007
Sample 8	0.244		0.039	96.85		15.77		31.54	31.54 pg/ml									18.75	0.252	0.047
Sample 9	0.197		-0.008	77.83		-3.25		-6.5	< 4.688 pg/ml									37.5	0.351	0.146
Sample 10	0.166		-0.039	65.12		-15.96		-31.92	< 4.688 pg/ml									75	0.363	0.158
Sample 11	0.221		0.016	87.58		6.5		13	13 pg/ml									150	0.592	0.387
Sample 12	0.156		-0.049	60.99		-20.09		-40.18	< 4.688 pg/ml									300	1.012	0.807
Sample 13	0.226		0.021	89.6		8.52		17.04	17.04 pg/ml
Sample 14	0.241		0.036	95.64		14.56		29.12	29.12 pg/ml
Sample 15	0.227		0.022	90		8.92		17.84	17.84 pg/ml									Standard values for Samples 89–168
Sample 16	0.192		-0.013	75.78		-5.3		-10.6	< 4.688 pg/ml									Standard	Absorbance for std 1	Absorbance for std 2	Average	Blank Corrected
Sample 17	0.2		-0.005	79.05		-2.03		-4.06	< 4.688 pg/ml									0	0.11	0.133	0.1215	0
Sample 18	0.692		0.487	262.18		181.1		362.2	362.2 pg/ml									4.688	0.163	0.127	0.145	0.0235
Sample 19	0.142		-0.063	55.2		-25.88		-51.76	< 4.688 pg/ml									9.375	0.201	0.159	0.18	0.0585
Sample 20	0.214		0.009	84.74		3.66		7.32	< 4.688 pg/ml									18.75	0.198	0.162	0.18	0.0585
Sample 21	0.176		-0.029	69.23		-11.85		-23.7	< 4.688 pg/ml									37.5	0.236	0.17	0.203	0.0815
Sample 22	0.267		0.062	106.04		24.96		49.92	49.92 pg/ml									75	0.243	0.225	0.234	0.1125
Sample 23	0.156		-0.049	60.99		-20.09		-40.18	< 4.688 pg/ml						Samples 1-88	Samples 89-168	Samples 169-189	150	0.327	0.308	0.3175	0.196
Sample 24	0.136		-0.069	52.7		-28.38		-56.76	< 4.688 pg/ml					x3	57703.7	6.97469e-09	-2.60508e-09	300	0.49	0.465	0.4775	0.356
Sample 25	0.142		-0.063	55.2		-25.88		-51.76	< 4.688 pg/ml					x2	6.13983e-07	-3.42676e-06	-2.33468e-06
Sample 26	0.207		0.002	91.9		10.82		21.64	21.64 pg/ml					x	0.00232764	0.00151399	0.00282709
Sample 27	0.151		-0.054	58.93		-22.15		-44.3	< 4.688 pg/ml					c	0.0113735	0.0100527	0.0136909
Sample 28	0.16		-0.045	62.65		-18.43		-36.86	< 4.688 pg/ml									Standard values for Samples 169–189
Sample 29	0.324		0.119	128.52		47.44		94.88	94.88 pg/ml									Standard	Absorbance for std 1	Absorbance for std 2	Average	Blank Corrected
Sample 30	0.163		-0.042	63.88		-17.2		-34.4	< 4.688 pg/ml									0	0.13	0.102	0.116	0
Sample 31	0.16		-0.045	62.65		-18.43		-36.86	< 4.688 pg/ml									4.688	0.141	0.116	0.1285	0.0125
Sample 32	0.151		-0.054	58.9		-22.18		-44.36	< 4.688 pg/ml									9.375	0.179	0.159	0.169	0.053
Sample 33	0.188		-0.017	74.15		-6.93		-13.86	< 4.688 pg/ml									18.75	0.203	0.197	0.2	0.084
Sample 34	0.274		0.069	108.83		27.75		55.5	55.5 pg/ml									37.5	0.237	0.219	0.228	0.112
Sample 35	0.164		-0.041	64.3		-16.78		-33.56	< 4.688 pg/ml									75	0.36	0.289	0.3245	0.2085
Sample 36	0.155		-0.05	60.6		-20.48		-40.96	< 4.688 pg/ml									150	0.436	0.508	0.472	0.356
Sample 37	0.178		-0.027	70.05		-11.03		-22.06	< 4.688 pg/ml									300	0.882	0.626	0.754	0.638
Sample 38	0.191		-0.014	75.38		-5.7		-11.4	< 4.688 pg/ml
Sample 39	2.041		1.836	615.72		534.64		1069.28	>300 pg/ml
Sample 40	0.174		-0.031	68.41		-12.67		-25.34	< 4.688 pg/ml
Sample 41	0.165		-0.04	64.71		-16.37		-32.74	< 4.688 pg/ml
Sample 42	0.188		-0.017	74.15		-6.93		-13.86	< 4.688 pg/ml
Sample 43	0.283		0.078	112.4		31.32		62.64	62.64 pg/ml
Sample 44	0.175		-0.03	68.82		-12.26		-24.52	< 4.688 pg/ml
Sample 45	0.168		-0.037	65.94		-15.14		-30.28	< 4.688 pg/ml
Sample 46	0.152		-0.053	59.34		-21.74		-43.48	< 4.688 pg/ml
Sample 47	0.196		-0.009	77.42		-3.66		-7.32	< 4.688 pg/ml
Sample 48	0.359		0.154	142.08		61		122	122 pg/ml
Sample 49	0.179		-0.026	70.46		-10.62		-21.24	< 4.688 pg/ml
Sample 50	0.172		-0.033	67.59		-13.49		-26.98	< 4.688 pg/ml
Sample 51	0.158		-0.047	61.82		-19.26		-38.52	< 4.688 pg/ml
Sample 52	0.153		-0.052	59.75		-21.33		-42.66	< 4.688 pg/ml
Sample 53	0.173		-0.032	68		-13.08		-26.16	< 4.688 pg/ml
Sample 54	0.186		-0.019	73.33		-7.75		-15.5	< 4.688 pg/ml
Sample 55	0.17		-0.035	66.77		-14.31		-28.62	< 4.688 pg/ml
Sample 56	2.818		2.613	759.87		678.79		1357.58	> 300 pg/ml
Sample 57	0.182		-0.023	71.7		-9.38		-18.76	< 4.688 pg/ml
Sample 58	0.173		-0.032	68		-13.08		-26.16	< 4.688 pg/ml
Sample 59	0.683		0.478	259.15		178.07		356.14	356.14 pg/ml
Sample 60	0.187		-0.018	73.74		-7.34		-14.68	< 4.688 pg/ml
Sample 61	0.209		0.004	82.71		1.63		3.26	< 4.688 pg/ml
Sample 62	0.196		-0.009	77.42		-3.66		-7.32	< 4.688 pg/ml
Sample 63	0.17		-0.035	66.77		-14.31		-28.62	< 4.688 pg/ml
Sample 64	0.172		-0.033	67.59		-13.49		-26.98	< 4.688 pg/ml
Sample 65	0.172		-0.033	67.59		-13.49		-26.98	< 4.688 pg/ml
Sample 66	0.186		-0.019	73.33		-7.75		-15.5	< 4.688 pg/ml
Sample 67	0.206		0.001	81.5		0.42		0.84	< 4.688 pg/ml
Sample 68	0.377		0.172	149		67.92		135.84	135.84 pg/ml
Sample 69	0.2		-0.005	79.05		-2.03		-4.06	< 4.688 pg/ml
Sample 70	0.185		-0.02	72.92		-8.16		-16.32	< 4.688 pg/ml
Sample 71	0.214		0.009	84.74		3.66		7.32	< 4.688 pg/ml
Sample 72	0.181		-0.024	71.28		-9.8		-19.6	< 4.688 pg/ml
Sample 73	0.178		-0.027	70.05		-11.03		-22.06	< 4.688 pg/ml
Sample 74	0.176		-0.029	69.23		-11.85		-23.7	< 4.688 pg/ml
Sample 75	0.22		0.015	87.17		6.09		12.18	12.18 pg/ml
Sample 76	0.204		-0.001	80.68		-0.4		-0.8	< 4.688 pg/ml
Sample 77	0.235		0.03	93.23		12.15		24.3	24.3 pg/ml
Sample 78	0.23		0.025	91.21		10.13		20.26	20.26 pg/ml
Sample 79	0.194		-0.011	76.6		-4.48		-8.96	< 4.688 pg/ml
Sample 80	0.254		0.049	100.85		19.77		39.54	39.54 pg/ml
Sample 81	0.211		0.006	83.52		2.44		4.88	< 4.688 pg/ml
Sample 82	0.194		-0.011	76.6		-4.48		-8.96	< 4.688 pg/ml
Sample 83	0.318		0.113	126.17		45.09		90.18	90.18 pg/ml
Sample 84	0.222		0.017	87.98		6.9		13.8	13.8 pg/ml
Sample 85	0.218		0.013	86.36		5.28		10.56	10.56 pg/ml
Sample 86	0.205		0	81.08		0		0	< 4.688 pg/ml
Sample 87	0.172		-0.033	67.59		-13.49		-26.98	< 4.688 pg/ml
Sample 88	0.351		0.146	138.91		57.83		115.66	115.66 pg/ml
Sample 89	0.134	0.1215	0.0125	83.88	72	11.88		23.76	23.76 pg/ml
Sample 90	0.1		-0.0215	53.49		-18.51		-37.02	< 4.688 pg/ml
Sample 91	0.109		-0.0125	60.96		-11.04		-22.08	< 4.688 pg/ml
Sample 92	0.103		-0.0185	55.94		-16.06		-32.12	< 4.688 pg/ml
Sample 93	0.131		0.0095	80.95		8.95		17.9	17.9 pg/ml
Sample 94	0.124		0.0025	74.31		2.31		4.62	< 4.688 pg/ml
Sample 95	0.086		-0.0355	42.6		-29.4		-58.8	< 4.688 pg/ml
Sample 96	0.119		-0.0025	69.73		-2.27		-4.54	< 4.688 pg/ml
Sample 97	0.36		0.2385	302.17		230.17		460.34	460.34 pg/ml
Sample 98	0.115		-0.0065	66.16		-5.84		-11.68	< 4.688 pg/ml
Sample 99	0.097		-0.0245	51.08		-20.92		-41.84	< 4.688 pg/ml
Sample 100	0.08		-0.0415	38.17		-33.83		-67.66	< 4.688 pg/ml
Sample 101	0.137		0.0155	86.86		14.86		29.72	29.72 pg/ml
Sample 102	0.119		-0.0025	69.73		-2.27		-4.54	< 4.688 pg/ml
Sample 103	0.142		0.0205	91.95		19.95		39.9	39.9 pg/ml
Sample 104	0.135		0.0135	84.87		12.87		25.74	25.74 pg/ml
Sample 105	0.098		-0.0235	51.88		-20.12		-40.24	< 4.688 pg/ml
Sample 106	0.088		-0.0335	44.1		-27.9		-55.8	< 4.688 pg/ml
Sample 107	0.1		-0.0215	53.49		-18.51		-37.02	< 4.688 pg/ml
Sample 108	0.111		-0.0105	62.67		-9.33		-18.66	< 4.688 pg/ml
Sample 109	0.11		-0.0115	61.81		-10.19		-20.38	< 4.688 pg/ml
Sample 110	0.108		-0.0135	60.11		-11.89		-23.78	< 4.688 pg/ml
Sample 111	0.098		-0.0235	51.88		-20.12		-40.24	< 4.688 pg/ml
Sample 112	0.117		-0.0045	67.93		-4.07		-8.14	< 4.688 pg/ml
Sample 113	0.127		0.0055	77.12		5.12		10.24	10.24 pg/ml
Sample 114	0.146		0.0245	96.13		24.13		48.26	48.26 pg/ml
Sample 115	0.101		-0.0205	54.3		-17.7		-35.4	< 4.688 pg/ml
Sample 116	0.109		-0.0125	60.96		-11.04		-22.08	< 4.688 pg/ml
Sample 117	0.107		-0.0145	59.27		-12.73		-25.46	< 4.688 pg/ml
Sample 118	0.118		-0.0035	68.83		-3.17		-6.34	< 4.688 pg/ml
Sample 119	0.089		-0.0325	44.86		-27.14		-54.28	< 4.688 pg/ml
Sample 120	0.2		0.0785	159.91		87.91		175.82	175.82 pg/ml
Sample 121	0.347		0.2255	294.46		222.46		444.92	444.92 pg/ml
Sample 122	0.103		-0.0185	55.94		-16.06		-32.12	< 4.688 pg/ml
Sample 123	0.142		0.0205	91.95		19.95		39.9	39.9 pg/ml
Sample 124	0.012		-0.1095	-4		-76		-152	< 4.688 pg/ml
Sample 125	0.129		0.0075	79.02		7.02		14.04	14.04 pg/ml
Sample 126	0.409		0.2875	327.9		255.9		511.8	511.8 pg/ml
Sample 127	0.074		-0.0475	33.88		-38.12		-76.24	< 4.688 pg/ml
Sample 128	0.063		-0.0585	26.35		-45.65		-91.3	< 4.688 pg/ml
Sample 129	0.141		0.0195	90.92		18.92		37.84	37.84 pg/ml
Sample 130	0.117		-0.0045	67.93		-4.07		-8.14	< 4.688 pg/ml
Sample 131	0.126		0.0045	76.18		4.18		8.36	< 4.688 pg/ml
Sample 132	0.129		0.0075	79.02		7.02		14.04	14.04 pg/ml
Sample 133	0.116		-0.0055	67.04		-4.96		-9.92	< 4.688 pg/ml
Sample 134	0.143		0.0215	92.99		20.99		41.98	41.98 pg/ml
Sample 135	0.091		-0.0305	46.39		-25.61		-51.22	< 4.688 pg/ml
Sample 136	0.08		-0.0415	38.17		-33.83		-67.66	< 4.688 pg/ml
Sample 137	0.208		0.0865	169.82		97.82		195.64	195.64 pg/ml
Sample 138	0.187		0.0655	143.74		71.74		143.48	143.48 pg/ml
Sample 139	0.112		-0.0095	63.54		-8.46		-16.92	< 4.688 pg/ml
Sample 140	0.118		-0.0035	68.83		-3.17		-6.34	< 4.688 pg/ml
Sample 141	0.128		0.0065	78.07		6.07		12.14	12.14 pg/ml
Sample 142	0.145		0.0235	95.08		23.08		46.16	46.16 pg/ml
Sample 143	0.133		0.0115	82.9		10.9		21.8	21.8 pg/ml
Sample 144	0.157		0.0355	108.09		36.09		72.18	72.18 pg/ml
Sample 145	0.131		0.0095	80.95		8.95		17.9	17.9 pg/ml
Sample 146	0.371		0.2495	308.38		236.38		472.76	472.76 pg/ml
Sample 147	0.102		-0.0195	55.12		-16.88		-33.76	< 4.688 pg/ml
Sample 148	0.124		0.0025	74.31		2.31		4.62	< 4.688 pg/ml
Sample 149	0.154		0.0325	104.76		32.76		65.52	65.52 pg/ml
Sample 150	0.133		0.0115	82.9		10.9		21.8	21.8 pg/ml
Sample 151	0.136		0.0145	85.86		13.86		27.72	27.72 pg/ml
Sample 152	0.155		0.0335	105.87		33.87		67.74	67.74 pg/ml
Sample 153	0.136		0.0145	85.86		13.86		27.72	27.72 pg/ml
Sample 154	0.092		-0.0295	47.16		-24.84		-49.68	< 4.688 pg/ml
Sample 155	0.137		0.0155	86.86		14.86		29.72	29.72 pg/ml
Sample 156	0.143		0.0215	92.99		20.99		41.98	41.98 pg/ml
Sample 157	0.197		0.0755	156.18		84.18		168.36	168.36 pg/ml
Sample 158	0.189		0.0675	146.22		74.22		148.44	148.44 pg/ml
Sample 159	0.141		0.0195	90.92		18.92		37.84	37.84 pg/ml
Sample 160	0.217		0.0955	180.77		108.77		217.54	217.54 pg/ml
Sample 161	0.452		0.3305	347.16		275.16		550.32	550.32 pg/ml
Sample 162	0.131		0.0095	80.95		8.95		17.9	17.9 pg/ml
Sample 163	0.201		0.0795	161.15		89.15		178.3	178.3 pg/ml
Sample 164	0.169		0.0475	121.9		49.9		99.8	99.8 pg/ml
Sample 165	0.195		0.0735	153.68		81.68		163.36	163.36 pg/ml
Sample 166	0.187		0.0655	143.74		71.74		143.48	143.48 pg/ml
Sample 167	0.145		0.0235	95.08		23.08		46.16	46.16 pg/ml
Sample 168	0.148		0.0265	97.45		25.45		50.9	50.9 pg/ml
Sample 169	0.208	0.116	0.092	73.13	35.7	37.43		74.86	74.86 pg/ml
Sample 170	0.13		0.014	40.93		5.23		10.46	10.46 pg/ml
Sample 171	0.111		-0.005	33.87		-1.83		-3.66	< 4.688 pg/ml
Sample 172	0.091		-0.025	26.74		-8.96		-17.92	< 4.688 pg/ml
Sample 173	0.142		0.026	45.53		9.83		19.66	19.66 pg/ml
Sample 174	0.186		0.07	63.47		27.77		55.54	19.66 pg/ml
Sample 175	0.134		0.018	42.45		6.75		13.5	13.5 pg/ml
Sample 176	0.236		0.12	86.13		50.43		100.86	100.86 pg/ml
Sample 177	2.09		1.974	561.42		525.72		1051.44	< 4.688 pg/ml
Sample 178	0.142		0.026	45.53		9.83		19.66	19.66 pg/ml
Sample 179	0.1		-0.016	29.91		-5.79		-11.58	< 4.688 pg/ml
Sample 180	0.11		-0.006	33.51		-2.19		-4.38	< 4.688 pg/ml
Sample 181	0.127		0.011	39.79		4.09		8.18	< 4.688 pg/ml
Sample 182	0.11		-0.006	33.51		-2.19		-4.38	< 4.688 pg/ml
Sample 183	0.149		0.033	48.27		12.57		25.14	25.14 pg/ml
Sample 184	0.192		0.076	66.06		30.36		60.72	60.72 pg/ml
Sample 185	0.157		0.041	51.45		15.75		31.5	31.5 pg/ml
Sample 186	0.129		0.013	40.55		4.85		9.7	9.7 pg/ml
Sample 187	0.083		-0.033	23.96		-11.74		-23.48	< 4.688 pg/ml
Sample 188	0.11		-0.006	33.51		-2.19		-4.38	< 4.688 pg/ml
Sample 189	0.122		0.006	37.92		2.22		4.44	< 4.688 pg/ml

## Sheet: CRP
Participant	CRP Absorbance	Blank corrected	Concentration ??	Final conc. (20 × dilution factor)	Interpretation
Sample 1	2.198	2.018	1876.95	37539	37539 pg/ml	20	0.18
Sample 2	2.321	2.141	2061.33	41226.6	> 40000 pg/ml									Standard values for samples 1–88
Sample 3	2.614	2.434	2303.98	46079.6	> 40000 pg/ml									Standard (pg/ml)	Absorbance	Blank corrected
Sample 4	2.708	2.528	2360.04	47200.8	> 40000 pg/ml						Samples 1-88	Samples 89-168	Samples 169-189	0	0.18	0
Sample 5	2.668	2.488	2336.98	46739.6	> 40000 pg/ml					x3	6.33863e-10	3.72645e-10	3.89441e-10	31.25	0.276	0.096
Sample 6	1.979	1.799	911.9	18238	18238 pg/ml					x2	-2.69138e-06	-1.85152e-06	-2.10886e-06	62.5	0.44	0.26
Sample 7	2.45	2.27	2185.96	43719.2	> 40000 pg/ml					x	0.00388771	0.00329327	0.00389189	125	0.659	0.479
Sample 8	1.977	1.797	908.35	18167	18167 pg/ml					c	0.0111851	-0.0698839	0.0348151	250	1.05	0.87
Sample 9	2.463	2.283	2196.59	43931.8	> 40000 pg/ml									500	1.49	1.31
Sample 10	2.347	2.167	2089.97	41799.4	> 40000 pg/ml									1000	2.035	1.855
Sample 11	2.577	2.397	2279.96	45599.2	> 40000 pg/ml									2000	2.271	2.091
Sample 12	2.641	2.461	2320.76	46415.2	> 40000 pg/ml
Sample 13	2.659	2.479	2331.63	46632.6	> 40000 pg/ml
Sample 14	2.384	2.204	2127.24	42544.8	> 40000 pg/ml
Sample 15	2.513	2.333	2235.13	44702.6	> 40000 pg/ml
Sample 16	2.67	2.49	2338.16	46763.2	> 40000 pg/ml									Standard values for Samples 89–168
Sample 17	2.109	1.929	1526.49	30529.8	30529.8 pg/ml									Standard	Absorbance for std 1	Absorbance for std 2	Average	Blank Corrected
Sample 18	1.873	1.693	763.87	15277.4	15277.4 pg/ml									0	0.323	0.727	0.525	0
Sample 19	2.638	2.458	2318.93	46378.6	> 40000 pg/ml									31.25	0.385	0.735	0.56	0.035
Sample 20	2.577	2.397	2279.96	45599.2	> 40000 pg/ml									62.5	0.56	0.829	0.6945	0.1695
Sample 21	2.566	2.386	2272.56	45451.2	> 40000 pg/ml									125	0.782	0.713	0.7475	0.2225
Sample 22	2.16	1.98	1783.67	35673.4	35673.4 pg/ml									250	0.986	1.049	1.0175	0.4925
Sample 23	2.376	2.196	2119.47	42389.4	> 40000 pg/ml									500	1.956	1.753	1.8545	1.3295
Sample 24	1.518	1.338	486.19	9723.8	9723.8 pg/ml									1000	2.152	2.298	2.225	1.7
Sample 25	1.92	1.74	821.44	16428.8	16428.8 pg/ml									2000	2.652	2.588	2.62	2.095
Sample 26	2.131	1.951	1675.54	33510.8	33510.8 pg/ml
Sample 27	2.313	2.133	2052.03	41040.6	> 40000 pg/ml
Sample 28	2.46	2.28	2194.16	43883.2	> 40000 pg/ml
Sample 29	2.573	2.393	2277.28	45545.6	> 40000 pg/ml
Sample 30	1.904	1.724	800.74	16014.8	16014.8 pg/ml
Sample 31	2.44	2.26	2177.6	43552	> 40000 pg/ml									Standard values for Samples 169–189
Sample 32	2.518	2.338	2238.8	44776	> 40000 pg/ml									Standard	Absorbance for std 1	Absorbance for std 2	Average	Corrected
Sample 33	2.094	1.914	1348.9	26978	26978 pg/ml									0	0.119	0.231	0.175	0
Sample 34	1.127	0.947	297.8	5956	5956 pg/ml									31.25	0.308	0.428	0.368	0.193
Sample 35	2.523	2.343	2242.44	44848.8	> 40000 pg/ml									62.5	0.407	0.41	0.4085	0.2335
Sample 36	2.465	2.285	2198.2	43964	> 40000 pg/ml									125	0.607	0.859	0.733	0.558
Sample 37	2.58	2.4	2281.95	45639	> 40000 pg/ml									250	1.108	0.926	1.017	0.842
Sample 38	2.024	1.844	1006.53	20130.6	20130.6 pg/ml									500	1.718	1.641	1.6795	1.5045
Sample 39	2.353	2.173	2096.27	41925.4	> 40000 pg/ml									1000	2.445	2.323	2.384	2.209
Sample 40	2.283	2.103	2014.77	40295.4	> 40000 pg/ml									2000	2.621	2.726	2.6735	2.4985
Sample 41	2.048	1.868	1076.03	21520.6	21520.6 pg/ml
Sample 42	1.749	1.569	644.86	12897.2	12897.2 pg/ml
Sample 43	2.577	2.397	2279.96	45599.2	> 40000 pg/ml
Sample 44	2.44	2.26	2177.6	43552	> 40000 pg/ml
Sample 45	2.385	2.205	2128.2	42564	> 40000 pg/ml
Sample 46	2.342	2.162	2084.63	41692.6	> 40000 pg/ml
Sample 47	2.513	2.333	2235.13	44702.6	> 40000 pg/ml
Sample 48	2.601	2.421	2295.68	45913.6	> 40000 pg/ml
Sample 49	2.045	1.865	1066.15	21323	21323 pg/ml
Sample 50	2.449	2.269	2185.13	43702.6	> 40000 pg/ml
Sample 51	2.438	2.258	2175.9	43518	> 40000 pg/ml
Sample 52	2.435	2.255	2173.35	43467	> 40000 pg/ml
Sample 53	2.573	2.393	2277.28	45545.6	> 40000 pg/ml
Sample 54	2.098	1.918	1397.52	27950.4	27950.4 pg/ml
Sample 55	2.188	2.008	1855.46	37109.2	37109.2 pg/ml
Sample 56	2.175	1.995	1824.63	36492.6	36492.6 pg/ml
Sample 57	2.045	1.865	1066.15	21323	21323 pg/ml
Sample 58	2.233	2.053	1941.42	38828.4	38828.4 pg/ml
Sample 59	2.314	2.134	2053.21	41064.2	> 40000 pg/ml
Sample 60	2.699	2.519	2354.94	47098.8	> 40000 pg/ml
Sample 61	2.756	2.576	2386.36	47727.2	> 40000 pg/ml
Sample 62	1.827	1.647	715.31	14306.2	14306.2 pg/ml
Sample 63	2.455	2.275	2190.08	43801.6	> 40000 pg/ml
Sample 64	2.407	2.227	2148.7	42974	> 40000 pg/ml
Sample 65	2.128	1.948	1660.54	33210.8	33210.8 pg/ml
Sample 66	2.193	2.013	1866.42	37328.4	37328.4 pg/ml
Sample 67	2.438	2.258	2175.9	43518	> 40000 pg/ml
Sample 68	2.398	2.218	2140.44	42808.8	> 40000 pg/ml
Sample 69	2.341	2.161	2083.56	41671.2	> 40000 pg/ml
Sample 70	1.983	1.803	919.13	18382.6	18382.6 pg/ml
Sample 71	2.151	1.971	1755.29	35105.8	35105.8 pg/ml
Sample 72	2.635	2.455	2317.09	46341.8	> 40000 pg/ml
Sample 73	1.907	1.727	804.53	16090.6	16090.6 pg/ml
Sample 74	1.977	1.797	908.35	18167	18167 pg/ml
Sample 75	2.155	1.975	1768.33	35366.6	35366.6 pg/ml
Sample 76	2.18	2	1836.92	36738.4	36738.4 pg/ml
Sample 77	2.325	2.145	2065.88	41317.6	> 40000 pg/ml
Sample 78	2.254	2.074	1974.31	39486.2	39486.2 pg/ml
Sample 79	2.286	2.106	2018.69	40373.8	> 40000 pg/ml
Sample 80	2.471	2.291	2202.99	44059.8	> 40000 pg/ml
Sample 81	1.927	1.747	830.92	16618.4	16618.4 pg/ml
Sample 82	2.18	2	1836.92	36738.4	36738.4 pg/ml
Sample 83	2.142	1.962	1722.92	34458.4	34458.4 pg/ml
Sample 84	2.253	2.073	1972.82	39456.4	39456.4 pg/ml
Sample 85	2.11	1.93	1536.09	30721.8	30721.8 pg/ml
Sample 86	2.129	1.949	1665.66	33313.2	33313.2 pg/ml
Sample 87	2.275	2.095	2004.1	40082	> 40000 pg/ml
Sample 88	2.244	2.064	1959.08	39181.6	39181.6 pg/ml
Sample 89	2.412	1.887	2282.14	45642.8	45642.8 pg/ml		0.525
Sample 90	2.245	1.72	1918.97	38379.4	38379.4 pg/ml
Sample 91	2.769	2.244	2649.39	52987.8	> 40000 pg/ml
Sample 92	2.437	1.912	2318.34	46366.8	46366.8 pg/ml
Sample 93	2.081	1.556	1299.97	25999.4	25999.4 pg/ml
Sample 94	2.507	1.982	2407.41	48148.2	48148.2 pg/ml
Sample 95	2.429	1.904	2307.05	46141	46141 pg/ml
Sample 96	2.651	2.126	2553.16	51063.2	> 40000 pg/ml
Sample 97	2.468	1.943	2359.77	47195.4	47195.4 pg/ml
Sample 98	2.453	1.928	2340.16	46803.2	46803.2 pg/ml
Sample 99	2.769	2.244	2649.39	52987.8	> 40000 pg/ml
Sample 100	2.704	2.179	2598.37	51967.4	> 40000 pg/ml
Sample 101	2.404	1.879	2269.95	45399	45399 pg/ml
Sample 102	2.507	1.982	2407.41	48148.2	48148.2 pg/ml
Sample 103	2.656	2.131	2557.58	51151.6	> 40000 pg/ml
Sample 104	2.616	2.091	2521.18	50423.6	50423.6 pg/ml
Sample 105	2.446	1.921	2330.73	46614.6	46614.6 pg/ml
Sample 106	2.257	1.732	1956.98	39139.6	39139.6 pg/ml
Sample 107	2.833	2.308	2695.71	53914.2	> 40000 pg/ml
Sample 108	2.202	1.677	1757.49	35149.8	35149.8 pg/ml
Sample 109	2.43	1.905	2308.47	46169.4	46169.4 pg/ml
Sample 110	1.883	1.358	944.64	18892.8	18892.8 pg/ml
Sample 111	2.694	2.169	2590.11	51802.2	> 40000 pg/ml
Sample 112	2.004	1.479	1128.13	22562.6	22562.6 pg/ml
Sample 113	2.425	1.9	2301.3	46026	46026 pg/ml
Sample 114	2.311	1.786	2098.05	41961	41961 pg/ml
Sample 115	2.819	2.294	2685.87	53717.4	> 40000 pg/ml
Sample 116	2.442	1.917	2325.26	46505.2	46505.2 pg/ml
Sample 117	2.5	1.975	2399.19	47983.8	47983.8 pg/ml
Sample 118	2.264	1.739	1977.87	39557.4	39557.4 pg/ml
Sample 119	1.953	1.428	1042.01	20840.2	20840.2 pg/ml
Sample 120	1.606	1.081	676.47	13529.4	13529.4 pg/ml
Sample 121	2.399	1.874	2262.17	45243.4	45243.4 pg/ml
Sample 122	2.435	1.91	2315.54	46310.8	46310.8 pg/ml
Sample 123	2.806	2.281	2676.6	53532	> 40000 pg/ml
Sample 124	2.129	1.604	1451.44	29028.8	29028.8 pg/ml
Sample 125	2.318	1.793	2113.51	42270.2	42270.2 pg/ml
Sample 126	1.752	1.227	801.38	16027.6	16027.6 pg/ml
Sample 127	2.574	2.049	2480.18	49603.6	49603.6 pg/ml
Sample 128	2.279	1.754	2019.74	40394.8	40394.8 pg/ml
Sample 129	2.476	1.951	2369.92	47398.4	47398.4 pg/ml
Sample 130	2.412	1.887	2282.14	45642.8	45642.8 pg/ml
Sample 131	2.647	2.122	2549.6	50992	> 40000 pg/ml
Sample 132	2.005	1.48	1129.99	22599.8	22599.8 pg/ml
Sample 133	2.506	1.981	2406.25	48125	48125 pg/ml
Sample 134	2.046	1.521	1213.72	24274.4	24274.4 pg/ml
Sample 135	2.656	2.131	2557.58	51151.6	> 40000 pg/ml
Sample 136	2.145	1.62	1512.73	30254.6	30254.6 pg/ml
Sample 137	2.663	2.138	2563.72	51274.4	> 40000 pg/ml
Sample 138	2.685	2.16	2582.57	51651.4	> 40000 pg/ml
Sample 139	2.819	2.294	2685.87	53717.4	> 40000 pg/ml
Sample 140	2.835	2.31	2697.1	53942	> 40000 pg/ml
Sample 141	2.759	2.234	2641.82	52836.4	> 40000 pg/ml
Sample 142	2.711	2.186	2604.08	52081.6	> 40000 pg/ml
Sample 143	2.832	2.307	2695.01	53900.2	> 40000 pg/ml
Sample 144	3.031	2.506	2820.57	56411.4	> 40000 pg/ml
Sample 145	2.784	2.259	2660.57	53211.4	> 40000 pg/ml
Sample 146	2.78	2.255	2657.61	53152.2	> 40000 pg/ml
Sample 147	2.755	2.23	2638.77	52775.4	> 40000 pg/ml
Sample 148	2.704	2.179	2598.37	51967.4	> 40000 pg/ml
Sample 149	2.834	2.309	2696.41	53928.2	> 40000 pg/ml
Sample 150	2.589	2.064	2495.18	49903.6	49903.6 pg/ml
Sample 151	2.714	2.189	2606.51	52130.2	> 40000 pg/ml
Sample 152	2.935	2.41	2763.05	55261	> 40000 pg/ml
Sample 153	2.709	2.184	2602.46	52049.2	> 40000 pg/ml
Sample 154	2.718	2.193	2609.74	52194.8	> 40000 pg/ml
Sample 155	2.819	2.294	2685.87	53717.4	> 40000 pg/ml
Sample 156	2.89	2.365	2734.22	54684.4	> 40000 pg/ml
Sample 157	2.782	2.257	2659.09	53181.8	> 40000 pg/ml
Sample 158	2.711	2.186	2604.08	52081.6	> 40000 pg/ml
Sample 159	2.819	2.294	2685.87	53717.4	> 40000 pg/ml
Sample 160	2.917	2.392	2751.67	55033.4	> 40000 pg/ml
Sample 161	2.145	1.62	1512.73	30254.6	30254.6 pg/ml
Sample 162	2.617	2.092	2522.12	50442.4	50442.4 pg/ml
Sample 163	2.694	2.169	2590.11	51802.2	> 40000 pg/ml
Sample 164	2.394	1.869	2254.26	45085.2	45085.2 pg/ml
Sample 165	2.834	2.309	2696.41	53928.2	> 40000 pg/ml
Sample 166	2.7	2.175	2595.08	51901.6	> 40000 pg/ml
Sample 167	2.656	2.131	2557.58	51151.6	> 40000 pg/ml
Sample 168	2.633	2.108	2536.95	50739	> 40000 pg/ml
Sample 169	2.829	2.654	2467.64	49352.8	> 40000 pg/ml		0.175
Sample 170	2.599	2.424	1401	28020	28020 pg/ml
Sample 171	2.874	2.699	2536.5	50730	> 40000 pg/ml
Sample 172	2.861	2.686	2517.79	50355.8	> 40000 pg/ml
Sample 173	2.707	2.532	2160.54	43210.8	> 40000 pg/ml
Sample 174	2.662	2.487	1838.11	36762.2	36762.2 pg/ml
Sample 175	2.789	2.614	2394.03	47880.6	> 40000 pg/ml
Sample 176	2.69	2.515	2075.8	41516	> 40000 pg/ml
Sample 177	2.729	2.554	2242.18	44843.6	> 40000 pg/ml
Sample 178	2.616	2.441	1470.33	29406.6	29406.6 pg/ml
Sample 179	2.846	2.671	2495.06	49901.2	> 40000 pg/ml
Sample 180	2.767	2.592	2346.05	46921	> 40000 pg/ml
Sample 181	2.707	2.532	2160.54	43210.8	> 40000 pg/ml
Sample 182	2.681	2.506	2017.29	40345.8	> 40000 pg/ml
Sample 183	2.844	2.669	2491.93	49838.6	> 40000 pg/ml
Sample 184	2.741	2.566	2278.78	45575.6	> 40000 pg/ml
Sample 185	2.739	2.564	2272.98	45459.6	> 40000 pg/ml
Sample 186	2.624	2.449	1510.08	30201.6	30201.6 pg/ml
Sample 187	2.795	2.62	2406.05	48121	> 40000 pg/ml
Sample 188	2.736	2.561	2264.06	45281.2	> 40000 pg/ml
Sample 189	2.669	2.494	1914.34	38286.8	38286.8 pg/ml

## Sheet: IgG
Participant ID	IgG titers (units/mL)	Final titers (×1000) (Units/mL)
1	280750	280750000
2	294350	294350000
3	245850	2.4585e+08
4	147050	147050000
5	189050	1.8905e+08
6	221150	2.2115e+08
7	219350	219350000
8	273150	273150000
9	336550	3.3655e+08
10	287250	287250000
11	183750	1.8375e+08
12	266950	266950000
13	157350	1.5735e+08
14	204150	204150000
15	268550	268550000
16	285650	285650000
17	274350	274350000
18	294350	294350000
19	264350	264350000
20	236850	236850000
21	248550	2.4855e+08
22	200650	2.0065e+08
23	268550	268550000
24	294850	294850000
25	290450	290450000
26	287250	287250000
27	259250	259250000
28	275950	275950000
29	266150	266150000
30	196450	1.9645e+08
31	257950	2.5795e+08
32	276350	276350000
33	286350	286350000
34	291850	2.9185e+08
35	56150	5.615e+07
36	275950	275950000
37	261050	2.6105e+08
38	203350	203350000
39	194850	1.9485e+08
40	267350	267350000
41	268750	268750000
42	223950	223950000
43	190150	1.9015e+08
44	261850	2.6185e+08
45	261050	2.6105e+08
46	182950	1.8295e+08
47	257950	2.5795e+08
48	158850	158850000
49	180150	1.8015e+08
50	269650	2.6965e+08
51	231050	231050000
52	228250	228250000
53	226350	226350000
54	181750	1.8175e+08
55	184650	184650000
56	161250	161250000
57	262650	262650000
58	255050	2.5505e+08
59	245050	2.4505e+08
60	271150	271150000
61	232150	2.3215e+08
62	178950	1.7895e+08
63	234150	2.3415e+08
64	251550	2.5155e+08
65	268750	268750000
66	183950	1.8395e+08
67	115150	1.1515e+08
68	235450	235450000
69	255450	2.5545e+08
70	171450	1.7145e+08
71	209850	209850000
72	106550	1.0655e+08
73	264950	264950000
74	255050	2.5505e+08
75	240050	240050000
76	75750	7.575e+07
77	296250	2.9625e+08
78	166350	1.6635e+08
79	241550	241550000
80	238650	238650000
81	274350	274350000
82	234150	2.3415e+08
83	184850	1.8485e+08
84	266950	266950000
85	244250	2.4425e+08
86	150695	150695000
87	148195	148195000
88	135195	135195000
89	147095	147095000
90	132795	132795000
91	109645	1.09645e+08
92	137295	137295000
93	139095	1.39095e+08
94	94845	94845000
95	148195	148195000
96	132395	1.32395e+08
97	145245	145245000
98	138695	1.38695e+08
99	99945	9.9945e+07
100	136595	136595000
101	116895	1.16895e+08
102	143395	143395000
103	141195	141195000
104	136445	1.36445e+08
105	54295	54295000
106	35595	3.5595e+07
107	104345	1.04345e+08
108	129395	1.29395e+08
109	49795	4.9795e+07
110	43995	43995000
111	122395	122395000
112	126795	1.26795e+08
113	61445	61445000
114	65445	6.5445e+07
115	100995	1.00995e+08
116	133545	133545000
117	131195	1.31195e+08
118	55395	55395000
119	139045	1.39045e+08
120	92195	92195000
121	1195	1.195e+06
122	128995	1.28995e+08
123	102995	1.02995e+08
124	123295	1.23295e+08
125	115695	1.15695e+08
126	143395	143395000
127	132145	132145000
128	112595	1.12595e+08
129	66095	66095000
130	64995	64995000
131	90745	9.0745e+07
132	13545	13545000
133	62545	62545000
134	131695	131695000
135	133695	133695000
136	125595	1.25595e+08
137	136445	1.36445e+08
138	22195	22195000
139	91895	91895000
140	128045	128045000
141	125445	125445000
142	130795	1.30795e+08
143	128095	128095000
144	123395	123395000
145	121045	1.21045e+08
146	111295	111295000
147	56145	5.6145e+07
148	68395	68395000
149	118945	118945000
150	70545	70545000
151	131645	131645000
152	118995	118995000
153	129295	129295000
154	133845	1.33845e+08
155	85495	8.5495e+07
156	104945	1.04945e+08
157	118645	1.18645e+08
158	129945	1.29945e+08
159	128095	128095000
160	48545	48545000
161	12945	12945000
162	148895	148895000
163	87395	87395000
164	126345	1.26345e+08
165	115945	115945000
166	70045	70045000
167	107645	1.07645e+08
168	121395	121395000
169	19045	1.9045e+07
170	133845	1.33845e+08
171	239920	2.3992e+08
172	290620	2.9062e+08
173	248120	2.4812e+08
174	234020	2.3402e+08
175	138420	138420000
176	244920	2.4492e+08
177	218320	2.1832e+08
178	275720	2.7572e+08
179	287620	287620000
180	290620	2.9062e+08
181	120620	1.2062e+08
182	267620	267620000
183	164820	164820000
184	271120	271120000
185	100120	100120000
186	272220	272220000
187	297320	2.9732e+08
188	272920	272920000
189	292420	292420000

## Sheet: Vaccination status and IgG
COVID-19 Vaccination (1, yes; 2, no)	Final titers (×1000) (Units/mL)
1	280750000
1	294350000
1	2.4585e+08
2	147050000
2	1.8905e+08
1	2.2115e+08
2	219350000
2	273150000
1	3.3655e+08
1	287250000
2	1.8375e+08
1	266950000
1	1.5735e+08
1	204150000
1	268550000
1	285650000
1	274350000
2	294350000
2	264350000
1	236850000
1	2.4855e+08
1	2.0065e+08
1	268550000
2	294850000
2	290450000
1	287250000
1	259250000
1	275950000
1	266150000
2	1.9645e+08
1	2.5795e+08
1	276350000
2	286350000
2	2.9185e+08
1	5.615e+07
2	275950000
1	2.6105e+08
2	203350000
1	1.9485e+08
1	267350000
	268750000
	223950000
	1.9015e+08
	2.6185e+08
	2.6105e+08
	1.8295e+08
	2.5795e+08
	158850000
	1.8015e+08
	2.6965e+08
	231050000
	228250000
	226350000
	1.8175e+08
	184650000
	161250000
	262650000
	2.5505e+08
	2.4505e+08
	271150000
	2.3215e+08
	1.7895e+08
	2.3415e+08
	2.5155e+08
	268750000
	1.8395e+08
	1.1515e+08
	235450000
	2.5545e+08
	1.7145e+08
	209850000
	1.0655e+08
	264950000
	2.5505e+08
	240050000
	7.575e+07
	2.9625e+08
	1.6635e+08
	241550000
	238650000
	274350000
	2.3415e+08
	1.8485e+08
	266950000
	2.4425e+08
	150695000
	148195000
	135195000
	147095000
	132795000
	1.09645e+08
	137295000
	1.39095e+08
	94845000
	148195000
	1.32395e+08
	145245000
	1.38695e+08
	9.9945e+07
	136595000
	1.16895e+08
	143395000
	141195000
	1.36445e+08
	54295000
	3.5595e+07
	1.04345e+08
	1.29395e+08
	4.9795e+07
	43995000
	122395000
	1.26795e+08
	61445000
	6.5445e+07
	1.00995e+08
	133545000
	1.31195e+08
	55395000
	1.39045e+08
	92195000
	1.195e+06
	1.28995e+08
	1.02995e+08
	1.23295e+08
	1.15695e+08
	143395000
	132145000
	1.12595e+08
	66095000
	64995000
	9.0745e+07
	13545000
	62545000
	131695000
	133695000
	1.25595e+08
	1.36445e+08
	22195000
	91895000
	128045000
	125445000
	1.30795e+08
	128095000
	123395000
	1.21045e+08
	111295000
	5.6145e+07
	68395000
	118945000
	70545000
	131645000
	118995000
	129295000
	1.33845e+08
	8.5495e+07
	1.04945e+08
	1.18645e+08
	1.29945e+08
	128095000
	48545000
	12945000
	148895000
	87395000
	1.26345e+08
	115945000
	70045000
	1.07645e+08
	121395000
	1.9045e+07
	1.33845e+08
	2.3992e+08
	2.9062e+08
	2.4812e+08
	2.3402e+08
	138420000
	2.4492e+08
	2.1832e+08
	2.7572e+08
	287620000
	2.9062e+08
	1.2062e+08
	267620000
	164820000
	271120000
	100120000
	272220000
	2.9732e+08
	272920000
	292420000

## Sheet: Age and Sex
id	Age	Sex (1, male; 2, female)				Mean age			Frequency of male and female
1	42	1				23.4603		Males	93	0.492
2	46	1						Female	96	0.508
3	21	2
4	20	2
5	21	1
6	20	1				Median age
7	30	1				21
8	27	1
9	20	2				Range
10	34	2				18–71
11	36	2
12	40	2
13	50	2				7.14178
14	39	2
15	43	2
16	29	1
17	22	1
18	19	2
19	20	2
20	20	2
21	19	2
22	20	2
23	20	1
24	20	2
25	20	2
26	19	2
27	19	2
28	25	1
29	24	2
30	20	2
31	20	2
32	19	2
33	19	2
34	33	2
35	23	2
36	21	2
37	26	2
38	21	1
39	22	1
40	21	1
41	21	1
42	23	1
43	21	1
44	21	1
45	21	1
46	21	1
47	20	1
48	22	1
49	22	1
50	26	1
51	25	2
52	20	2
53	20	1
54	20	2
55	32	2
56	38	2
57	21	2
58	20	2
59	71	1
60	43	2
61	42	2
62	42	2
63	42	1
64	32	1
65	25	2
66	23	1
67	19	2
68	20	2
69	20	2
70	20	2
71	20	1
72	21	2
73	20	1
74	21	1
75	19	1
76	19	1
77	20	2
78	21	2
79	21	2
80	20	2
81	21	2
82	19	2
83	20	1
84	21	1
85	20	1
86	30	1
87	21	1
88	25	2
89	20	1
90	20	2
91	21	2
92	19	2
93	22	2
94	20	2
95	20	2
96	19	1
97	21	1
98	20	1
99	21	1
100	28	1
101	24	1
102	19	2
103	19	2
104	20	2
105	20	2
106	19	1
107	20	2
108	20	2
109	20	1
110	19	1
111	20	1
112	21	1
113	20	1
114	20	1
115	20	2
116	19	1
117	19	2
118	20	1
119	19	2
120	21	1
121	21	1
122	20	1
123	20	1
124	20	2
125	22	1
126	24	1
127	20	1
128	23	2
129	24	1
130	24	2
131	25	2
132	26	1
133	32	1
134	25	2
135	25	2
136	37	2
137	22	1
138	20	1
139	23	1
140	20	2
141	20	1
142	21	1
143	20	1
144	20	2
145	20	2
146	21	1
147	21	1
148	24	1
149	27	1
150	25	1
151	28	1
152	23	1
153	24	2
154	20	2
155	20	2
156	20	2
157	21	2
158	20	2
159	19	2
160	22	2
161	29	1
162	21	1
163	20	1
164	21	1
165	25	1
166	49	1
167	22	1
168	18	2
169	19	2
170	20	2
171	18	2
172	19	2
173	19	2
174	22	2
175	20	2
176	22	2
177	18	1
178	19	2
179	19	2
180	18	2
181	18	1
182	23	1
183	27	1
184	20	1
185	27	1
186	25	1
187	25	1
188	25	2
189	25	1

## Sheet: Number and duration of symptoms
Participant ID	Last COVID-19 diagnosis	Fever (1, yes; 2, no)	cough (1, yes; 2, no)	Shortness of breath (1, yes; 2, no)	Sore throat (1, yes; 2, no)	Runny/stuffy nose (1, yes; 2, no)	Muscle/body aches (1, yes; 2, no)	Headaches (1, yes; 2, no)	Fatigue (1, yes; 2, no)	Diarrhea (1, yes; 2, no)	Loss of tase/smell (1, yes; 2, no)				number of symptoms	DURATION OF RECOVERY (1, less than two weeks; 2, two weeks to four weeks)
2	2021-12-01	1	1	2	1	1	1	1	1	2	2				7	1
7	2021	1	1	2	1	2	2	2	1	2	1				5	1
12	2021	1	2	2	1	2	2	1	1	2	1				5	1
16	2022	1	1	2	1	1	1	2	2	2	1				6	1
23	2021	1	2	2	1	1	2	2	1	2	1				5	2
27	2021	1	1	2	2	1	1	1	1	2	1				7	2
37	2021	2	1	2	1	1	1	1	1	2	2				6	1
48	2021	1	1	1	1	1	1	1	1	2	1				9	1
51	2021	1	1	1	2	2	1	1	1	2	2				6	2
55	2021	1	1	2	1	2	2	1	1	2	2				5	2
59	2022-12-01	1	1	2	1	1	1	2	1	2	2				6	1
61	2022-07-01	1	2	2	1	2	1	1	1	2	1				6	1
63	2020-06-01	2	2	2	2	2	1	1	1	2	2				3	1
64	2021	1	2	2	1	1	1	1	1	2	1				7	1
65	2021	1	1	2	1	1	1	1	1	2	1				8	2
67	2021	1	1	2	1	1	2	1	1	1	2				7	2
68	2021	2	1	2	1	1	2	1	1	2	2				5	1
69	2021	2	1	2	1	1	1	1	1	1	2				7	1
70	2021-12-01	1	1	1	1	1	1	1	1	2	2				8	1
71	2021	2	2	2	1	1	2	2	2	2	1				3	1
73	2021	1	1	2	1	1	2	1	1	2	2				6	1
74	2021	1	1	2	1	1	1	2	1	2	1				7	2
75	2021	1	1	2	1	1	1	1	1	2	1				8	1
89	2021	2	1	2	2	1	2	1	2	2	1				4	1
91	2021	1	2	2	2	2	1	1	1	2	1				5	1
94	2021-12-01	1	1	2	1	1	2	1	1	2	2				6	2
95	2022-10-01	1	1	1	1	1	2	2	1	2	1				7	1
96	2020-10-01	1	1	1	1	1	1	1	1	2	1				9	2
122	2021	1	1	2	1	1	1	1	1	2	1				8	2
123	2021	1	1	1	1	2	1	1	1	2	1				8	2
131	2021	1	1	1	2	2	2	1	1	2	1				6	1
135	2020-12-01	1	1	2	1	1	1	2	1	2	2				6	1
141	2021-12-01	2	1	2	1	2	2	2	2	2	1				3	1
142	2021	2	2	2	2	1	2	2	2	2	1				2	1
152	2021-12-01	1	1	2	1	1	1	1	1	2	1				8	1
155	2021	1	1	2	2	1	2	2	2	2	1				4	2
176	2020-08-01	1	1	1	1	1	1	1	1	2	2				8	2
183	2021	1	1	2	1	1	1	2	1	2	2				6	1
187	2022	1	2	2	1	2	1	2	1	2	2				4	1
188	2021	1	1	2	1	1	1	1	1	2	2				7	1

## Sheet: With post-COVID-19
Group	Number of Symptoms	Duration of Recovery (1, less than two weeks; 2, two weeks to four weeks)					IgG titers		Vaccination			Fever (1, yes; 2, no)	cough (1, yes; 2, no)	Shortness of breath (1, yes; 2, no)	Sore throat (1, yes; 2, no)	Runny/stuffy nose (1, yes; 2, no)	Muscle/body aches (1, yes; 2, no)	Headaches (1, yes; 2, no)	Fatigue (1, yes; 2, no)	Diarrhea (1, yes; 2, no)	Loss of tase/smell (1, yes; 2, no)
1	6	1					261050000		1			2	1	2	1	1	1	1	1	2	2
1	5	2					184650000		1			1	1	2	1	2	2	1	1	2	2
1	7	1					251550000		1			1	2	2	1	1	1	1	1	2	1
1	7	2					115150000		2			1	1	2	1	1	2	1	1	1	2
1	8	1					240050000		2			1	1	2	1	1	1	1	1	2	1
1	6	2					94845000		1			1	1	2	1	1	2	1	1	2	2
1	9	2					132395000		2			1	1	1	1	1	1	1	1	2	1
1	8	2					128995000		2			1	1	2	1	1	1	1	1	2	1
1	8	2					102995000		1			1	1	1	1	2	1	1	1	2	1
1	8	1					118995000		1			1	1	2	1	1	1	1	1	2	1
1	8	2					244920000		2			1	1	1	1	1	1	1	1	2	2
1	6	1					164820000		1			1	1	2	1	1	1	2	1	2	2
Average	7.16667	1.58333					1.70035e+08

## Sheet: Without post-COVID-19
Participant	Number of Symptoms	Duration of Recovery (1, less than two weeks; 2, two weeks to four weeks)	IgG titers	Vaccination (1-yes; 2-no)
2	7	1	294350000	1
7	5	1	219350000	1
12	5	1	266950000	1
16	6	1	285650000	1
23	5	2	268550000	1
27	7	2	259250000	2
48	9	1	158850000	2
51	6	2	231050000	1
59	6	1	2.4505e+08	1
61	6	1	2.3215e+08	1
63	3	1	2.3415e+08	1
65	8	2	268750000	2
68	5	1	235450000	2
69	7	1	2.5545e+08	1
70	8	1	1.7145e+08	1
71	3	1	209850000	1
73	6	1	264950000	1
74	7	2	2.5505e+08	2
89	4	1	147095000	1
91	5	1	1.09645e+08	1
95	7	1	148195000	2
131	6	1	9.0745e+07	2
135	6	1	133695000	1
141	3	1	125445000	2
142	2	1	1.30795e+08	1
155	4	2	85495000	2
187	4	1	2.9732e+08	1
188	7	1	272920000	1
Average	5.60714	1.21429	2.1063e+08

## Sheet: With PCC- date of COVID-19 diag
Participant Id	Date of COVID-19 diagnosis	chronic condition
37	2021
55	2021
64	2021
67	2021	asthma
75	2021
94	2021-12-01
96	2020-10-01
122	2021
123	2021
152	2021-12-01
176	2020-08-01
183	2021	asthma
